# Supplementary material
Source: PubMed Central journal article supplement (PMC7878290)
Supplement: NIHMS1639350-supplement-1.pdf [file NIHMS1639350-supplement-1.pdf]

**Supplementary table e1 lists the segmented regions of interest (ROIs) of the brain according to the Johns Hopkins University white matter atlas.**

|    |                    |                                                       |
|----|--------------------|-------------------------------------------------------|
| 1  | SFG_L              | Superior frontal gyrus (posterior segment) left       |
| 2  | SFG_R              | Superior frontal gyrus (posterior segment) right      |
| 3  | SFG_PFC_L          | Superior frontal gyrus (prefrontal cortex) left       |
| 4  | SFG_PFC_R          | Superior frontal gyrus (prefrontal cortex) right      |
| 5  | SFG_pole_L         | superior frontal gyrus (frontal pole) left            |
| 6  | SFG_pole_R         | superior frontal gyrus (frontal pole) right           |
| 7  | MFG_L              | Middle frontal gyrus (posterior segment) left         |
| 8  | MFG_R              | Middle frontal gyrus (posterior segment) right        |
| 9  | MFG_DPFC_L         | Middle frontal gyrus (dorsal prefrontal cortex) left  |
| 10 | MFG_DPFC_R         | Middle frontal gyrus (dorsal prefrontal cortex) right |
| 11 | IFG_opercularis_L  | inferior frontal gyrus pars opercularis left          |
| 12 | IFG_opercularis_R  | inferior frontal gyrus pars opercularis right         |
| 13 | IFG_orbitalis_L    | inferior frontal gyrus pars orbitalis left            |
| 14 | IFG_orbitalis_R    | inferior frontal gyrus pars orbitalis right           |
| 15 | IFG_triangularis_L | inferior frontal gyrus pars triangularis left         |
| 16 | IFG_triangularis_R | inferior frontal gyrus pars triangularis right        |
| 17 | LFOG_L             | Lateral Fronto-orbital gyrus left                     |
| 18 | LFOG_R             | Lateral fronto-orbital right                          |
| 19 | MFOG_L             | Middle fronto—orbital gyrus left                      |
| 20 | MFOG_R             | Middle fronto-orbital gyrus right                     |
| 21 | RG_L               | Gyrus rectus left                                     |
| 22 | RG_R               | Gyrus rectus right                                    |
| 23 | PoCG_L             | Postcentral gyrus left                                |
| 24 | PoCG_R             | Postcentral gyrus right                               |
| 25 | PrCG_L             | Precentral gyrus left                                 |
| 26 | PrCG_R             | Precentral gyrus right                                |

|    |            |                                       |
|----|------------|---------------------------------------|
| 27 | SPG_L      | Superior parietal gyrus left          |
| 28 | SPG_R      | Superior parietal gyrus right         |
| 29 | SMG_L      | Supramarginal gyrus left              |
| 30 | SMG_R      | Supramarginal gyrus right             |
| 31 | AG_L       | Angular gyrus left                    |
| 32 | AG_R       | Angular gyrus right                   |
| 33 | PrCu_L     | Pre-cuneus left                       |
| 34 | PrCu_R     | Pre-cuneus right                      |
| 35 | STG_L      | Superior temporal gyrus left          |
| 36 | STG_R      | Superior temporal gyrus right         |
| 37 | STG_L_pole | Pole of superior temporal gyrus left  |
| 38 | STG_R_pole | Pole of superior temporal gyrus right |
| 39 | MTG_L      | Middle temporal gyrus left            |
| 40 | MTG_R      | Middle temporal gyrus right           |
| 41 | MTG_L_pole | Pole of middle temporal gyrus left    |
| 42 | MTG_R_pole | Pole of middle temporal gyrus right   |
| 43 | ITG_L      | Inferior temporal gyrus left          |
| 44 | ITG_R      | Inferior temporal gyrus right         |
| 45 | PHG_L      | Parahippocampal gyrus left            |
| 46 | PHG_R      | Parahippocampal gyrus right           |
| 47 | ENT_L      | Entorhinal area left                  |
| 48 | ENT_R      | Entorhinal area right                 |
| 49 | FuG_L      | Fusiform gyrus left                   |
| 50 | FuG_R      | Fusiform gyrus right                  |
| 51 | SOG_L      | Superior occipital gyrus left         |
| 52 | SOG_R      | Superior occipital gyrus right        |
| 53 | MOG_L      | Middle occipital gyrus left           |
| 54 | MOG_R      | Middle occipital gyrus right          |
| 55 | IOG_L      | Inferior occipital gyrus left         |
| 56 | IOG_R      | Inferior occipital gyrus right        |

|    |                   |                                            |
|----|-------------------|--------------------------------------------|
| 57 | Cu_L              | Cuneus left                                |
| 58 | Cu_R              | Cuneus right                               |
| 59 | LG_L              | Lingual gyrus left                         |
| 60 | LG_R              | Lingual gyrus right                        |
| 61 | rostral_ACC_L     | rostral anterior cingulate gyrus left      |
| 62 | rostral_ACC_R     | rostral anterior cingulate gyrus right     |
| 63 | subcallosal_ACC_L | subcallosal anterior cingulate gyrus left  |
| 64 | subcallosal_ACC_R | subcallosal anterior cingulate gyrus right |
| 65 | subgenual_ACC_L   | subgenual anterior cingulate gyrus left    |
| 66 | subgenual_ACC_R   | subgenual anterior cingulate gyrus right   |
| 67 | dorsal_ACC_L      | dorsal anterior cingulate gyrus left       |
| 68 | dorsal_ACC_R      | dorsal anterior cingulate gyrus right      |
| 69 | PCC_L             | posterior cingulate gyrus left             |
| 70 | PCC_R             | posterior cingulate gyrus right            |
| 71 | Ins_L             | Insular left                               |
| 72 | Ins_R             | Insular right                              |
| 73 | Amyg_L            | Amygdala left                              |
| 74 | Amyg_R            | Amygdala right                             |
| 75 | Hippo_L           | Hippocampus left                           |
| 76 | Hippo_R           | Hippocampus right                          |
| 77 | Caud_L            | Caudate nucleus left                       |
| 78 | Caud_R            | Caudate nucleus right                      |
| 79 | Put_L             | Putamen left                               |
| 80 | Put_R             | Putamen right                              |
| 81 | GP_L              | Globus pallidus left                       |
| 82 | GP_R              | Globus pallidus right                      |
| 83 | Thal_L            | Thalamus left                              |
| 84 | Thal_R            | Thalamus right                             |
| 85 | Hypothalamus_L    | Hypothalamus left                          |
| 86 | Hypothalamus_R    | Hypothalamus right                         |

|     |                |                                              |
|-----|----------------|----------------------------------------------|
| 87  | Mynert_L       | Nucleus innominata of Mynert left            |
| 88  | Mynert_R       | Nucleus innominata of Mynert right           |
| 89  | NucAccumbens_L | Nucleus accumbens left                       |
| 90  | NucAccumbens_R | Nucleus accumbens right                      |
| 91  | RedNc_L        | Red Nucleus left                             |
| 92  | RedNc_R        | Red Nucleus right                            |
| 93  | Snigra_L       | Substantia Nigra left                        |
| 94  | Snigra_R       | Substantia Nigra right                       |
| 95  | cerebellum_L   | Cerebellum left                              |
| 96  | cerebellum_R   | Cerebellum right                             |
| 97  | CP_L           | Cerebral peduncle left                       |
| 98  | CP_R           | Cerebral peduncle right                      |
| 99  | Midbrain_L     | Midbrain left                                |
| 100 | Midbrain_R     | Midbrain right                               |
| 101 | CST_L          | Corticospinal tract left                     |
| 102 | CST_R          | Corticospinal tract right                    |
| 103 | SCP_L          | Superior cerebellar peduncle left            |
| 104 | SCP_R          | Superior cerebellar peduncle right           |
| 105 | MCP_L          | Middle cerebellar peduncle left              |
| 106 | MCP_R          | Middle cerebellar peduncle right             |
| 107 | PCT_L          | Pontine crossing tract (a part of MCP) left  |
| 108 | PCT_R          | Pontine crossing tract (a part of MCP) right |
| 109 | ICP_L          | Inferior cerebellar peduncle left            |
| 110 | ICP_R          | Inferior cerebellar peduncle right           |
| 111 | ML_L           | Medial lemniscus left                        |
| 112 | ML_R           | Medial lemniscus right                       |
| 113 | Pons_L         | Pons left                                    |
| 114 | Pons_R         | Pons right                                   |
| 115 | Medulla_L      | Medulla left                                 |
| 116 | Medulla_R      | Medulla right                                |

|     |         |                                                |
|-----|---------|------------------------------------------------|
| 117 | ACR_L   | Anterior corona radiata left                   |
| 118 | ACR_R   | Anterior corona radiata right                  |
| 119 | SCR_L   | Superior corona radiata left                   |
| 120 | SCR_R   | Superior corona radiata right                  |
| 121 | PCR_L   | Posterior corona radiata left                  |
| 122 | PCR_R   | Posterior corona radiata right                 |
| 123 | GCC_L   | Genu of corpus callosum left                   |
| 124 | GCC_R   | Genu of corpus callosum right                  |
| 125 | BCC_L   | Body of corpus callosum left                   |
| 126 | BCC_R   | Body of corpus callosum right                  |
| 127 | SCC_L   | Splenium of corpus callosum left               |
| 128 | SCC_R   | Splenium of corpus callosum right              |
| 129 | TAP_L   | Tapatum left                                   |
| 130 | TAP_R   | Tapatum right                                  |
| 131 | ALIC_L  | Anterior limb of internal capsule left         |
| 132 | ALIC_R  | Anterior limb of internal capsule right        |
| 133 | PLIC_L  | Posterior limb of internal capsule left        |
| 134 | PLIC_R  | Posterior limb of internal capsule right       |
| 135 | RLIC_L  | Retrolenticular part of internal capsule left  |
| 136 | RLIC_R  | Retrolenticular part of internal capsule right |
| 137 | EC_L    | External capsule left                          |
| 138 | EC_R    | External capsule right                         |
| 139 | CGC_L   | Cingulum (cingulate gyrus) left                |
| 140 | CGC_R   | Cingulum (cingulate gyrus) right               |
| 141 | CGH_L   | Cingulum (hippocampus) left                    |
| 142 | CGH_R   | Cingulum (hippocampus) right                   |
| 143 | Fx/ST_L | Fornix (cres) / Stria terminalis left          |
| 144 | Fx/ST_R | Fornix (cres) / Stria terminalis right         |
| 145 | Fx_L    | Fornix (column and body of fornix) left        |
| 146 | Fx_R    | Fornix (column and body of fornix) right       |

|     |                      |                                                                                                            |
|-----|----------------------|------------------------------------------------------------------------------------------------------------|
| 147 | IFO_L                | Inferior fronto-occipital fasciculus left                                                                  |
| 148 | IFO_R                | Inferior fronto-occipital fasciculus right                                                                 |
| 149 | PTR_L                | Posterior thalamic radiation (include optic radiation) left                                                |
| 150 | PTR_R                | Posterior thalamic radiation (include optic radiation) right                                               |
| 151 | SS_L                 | Sagittal stratum (include inferior longitudinal fasciculus and inferior fronto-occipital fasciculus) left  |
| 152 | SS_R                 | Sagittal stratum (include inferior longitudinal fasciculus and inferior fronto-occipital fasciculus) right |
| 153 | SFO_L                | Superior fronto-occipital fasciculus (could be a part of anterior internal capsule) left                   |
| 154 | SFO_R                | Superior fronto-occipital fasciculus (could be a part of anterior internal capsule) right                  |
| 155 | SLF_L                | Superior longitudinal fasciculus left                                                                      |
| 156 | SLF_R                | Superior longitudinal fasciculus right                                                                     |
| 157 | UNC_L                | Uncinate fasciculus left                                                                                   |
| 158 | UNC_R                | Uncinate fasciculus right                                                                                  |
| 159 | AnsaLenticularis_L   | Ansa lenticularis left                                                                                     |
| 160 | AnsaLenticularis_R   | Ansa lenticularis right                                                                                    |
| 161 | AnteriorCom_L        | Anterior commissure left                                                                                   |
| 162 | AnteriorCom_R        | Anterior commissure right                                                                                  |
| 163 | LenticularFasc_L     | Lenticular fasciculus left                                                                                 |
| 164 | LenticularFasc_R     | Lenticular fasciculus right                                                                                |
| 165 | OlfactoryRadiation_L | olfactory radiation left                                                                                   |
| 166 | OlfactoryRadiation_R | olfactory radiation right                                                                                  |
| 167 | Mammillary_L         | Mammillary body left                                                                                       |
| 168 | Mammillary_R         | Mammillary body right                                                                                      |
| 169 | OpticTract_L         | Optic tract left                                                                                           |

|     |                      |                                   |
|-----|----------------------|-----------------------------------|
| 170 | OpticTract_R         | Optic tract right                 |
| 171 | LV_frontal_L         | lateral ventricle_frontal left    |
| 172 | LV_body_L            | lateral ventricle_body left       |
| 173 | LV_atrium_L          | lateral ventricle_atrium left     |
| 174 | LV_occipital_L       | lateral ventricle_occipital left  |
| 175 | LV_temporal_L        | lateral ventricle_temporal left   |
| 176 | LV_frontal_R         | lateral ventricle_frontal right   |
| 177 | LV_body_R            | lateral ventricle_body right      |
| 178 | LV_atrium_R          | lateral ventricle_atrium right    |
| 179 | LV_occipital_R       | lateral ventricle_occipital right |
| 180 | LV_temporal_R        | lateral ventricle_temporal right  |
| 181 | III_and_IV_ventricle | III and IV ventricle              |

The bolded regions include the 48 ROIs representing the deep white matter structures that were subsequently selected for the statistical analyses.

**Table e2 shows the results of the unadjusted (univariable) analyses of the associations of rFA of the subcortical white matter regions of interest and ceramide subtypes in the study cohort.**

| Variable | R Cer<br>18:0 | R Cer<br>20:0 | R Cer<br>22:0 | R Cer<br>24:0 | R Cer<br>22:1 | R Cer<br>24:1 | P Cer<br>18:0 | P Cer<br>20:0 | P Cer<br>22:0 | P Cer<br>24:0 | P Cer<br>22:1 | P Cer<br>24:1 |
|----------|---------------|---------------|---------------|---------------|---------------|---------------|---------------|---------------|---------------|---------------|---------------|---------------|
| ACR_L    | -0.188        | -0.139        | -0.091        | 0.075         | -0.058        | -0.067        | 0.047         | 0.144         | 0.341         | 0.434         | 0.543         | 0.484         |
| ACR_R    | -0.171        | -0.070        | -0.026        | 0.156         | -0.084        | -0.07         | 0.071         | 0.466         | 0.784         | 0.101         | 0.377         | 0.466         |
| SCR_L    | -0.204        | -0.143        | -0.106        | 0.083         | -0.049        | -0.019        | 0.031         | 0.134         | 0.265         | 0.386         | 0.605         | 0.839         |
| SCR_R    | -0.190        | -0.095        | -0.071        | 0.135         | -0.087        | -0.122        | 0.045         | 0.318         | 0.455         | 0.154         | 0.364         | 0.199         |
| PCR_L    | -0.054        | 0.032         | 0.085         | 0.215         | 0.155         | 0.136         | 0.572         | 0.741         | 0.371         | 0.023         | 0.102         | 0.153         |
| PCR_R    | -0.146        | 0.026         | 0.028         | 0.177         | 0.064         | -0.119        | 0.125         | 0.782         | 0.770         | 0.063         | 0.499         | 0.213         |
| GCC_L    | -0.386        | -0.270        | -0.146        | 0.011         | -0.137        | -0.089        | 2.59E-05*     | 0.004         | 0.125         | 0.908         | 0.149         | 0.353         |
| GCC_R    | -0.220        | -0.139        | -0.011        | 0.12          | 0.008         | -0.033        | 0.02          | 0.144         | 0.906         | 0.208         | 0.93          | 0.730         |
| BCC_L    | -0.254        | -0.250        | -0.143        | 0.003         | -0.099        | -0.035        | 0.007         | 0.008         | 0.130         | 0.977         | 0.301         | 0.710         |
| BCC_R    | -0.311        | -0.274        | -0.186        | -0.04         | -0.093        | -0.074        | 0.001         | 0.003         | 0.049         | 0.676         | 0.33          | 0.437         |
| SCC_L    | -0.196        | -0.139        | -0.013        | 0.048         | -0.090        | -0.033        | 0.038         | 0.144         | 0.885         | 0.619         | 0.345         | 0.733         |
| SCC_R    | -0.207        | -0.130        | -0.003        | 0.091         | -0.044        | -0.054        | 0.028         | 0.170         | 0.971         | 0.339         | 0.646         | 0.569         |
| RAP_L    | -0.206        | -0.126        | -0.122        | -0.055        | -0.137        | -0.148        | 0.029         | 0.184         | 0.198         | 0.567         | 0.150         | 0.12          |
| RAP_R    | -0.197        | -0.004        | 0.039         | 0.114         | 0.048         | -0.086        | 0.037         | 0.967         | 0.683         | 0.230         | 0.613         | 0.367         |
| ALIC_L   | -0.050        | -0.034        | 0.045         | 0.245         | -0.038        | -0.123        | 0.597         | 0.739         | 0.637         | 0.009         | 0.694         | 0.198         |
| ALIC_R   | 0.039         | 0.020         | 0.103         | 0.339         | -0.045        | 0.054         | 0.680         | 0.835         | 0.281         | 0.0003        | 0.639         | 0.571         |
| PLIC_L   | 0.019         | 0.146         | 0.129         | 0.337         | 0.096         | 0.17          | 0.838         | 0.124         | 0.176         | 0.0003        | 0.311         | 0.073         |
| PLIC_R   | -0.085        | 0.002         | -0.021        | 0.259         | -0.043        | -0.033        | 0.375         | 0.98          | 0.825         | 0.006         | 0.655         | 0.728         |
| RLIC_L   | -0.081        | -0.025        | -0.027        | 0.098         | 0.09          | 0.132         | 0.395         | 0.792         | 0.774         | 0.303         | 0.346         | 0.165         |
| RLIC_R   | -0.110        | -0.069        | -0.04         | 0.126         | -0.085        | -0.226        | 0.247         | 0.473         | 0.678         | 0.185         | 0.376         | 0.016         |
| EC_L     | -0.264        | -0.128        | -0.112        | 0.106         | -0.108        | -0.218        | 0.005         | 0.180         | 0.241         | 0.267         | 0.258         | 0.021         |
| EC_R     | -0.150        | -0.082        | -0.02         | 0.114         | 0.013         | 0.026         | 0.115         | 0.391         | 0.836         | 0.232         | 0.887         | 0.79          |
| CGC_L    | -0.138        | -0.141        | -0.121        | 0.057         | -0.081        | -0.147        | 0.146         | 0.139         | 0.205         | 0.55          | 0.394         | 0.122         |
| CGC_R    | -0.088        | -0.095        | -0.097        | 0.039         | -0.185        | -0.158        | 0.358         | 0.318         | 0.307         | 0.687         | 0.051         | 0.1           |
| CGH_L    | -0.094        | -0.070        | -0.005        | 0.14          | 0.042         | 0.041         | 0.326         | 0.460         | 0.955         | 0.142         | 0.657         | 0.667         |
| CGH_R    | -0.120        | -0.094        | -0.131        | 0.083         | -0.157        | -0.082        | 0.209         | 0.324         | 0.17          | 0.382         | 0.099         | 0.391         |
| Fx/ST_L  | -0.265        | -0.147        | -0.131        | 0.1           | -0.045        | 0.031         | 0.005         | 0.121         | 0.17          | 0.312         | 0.638         | 0.747         |
| Fx/ST_R  | -0.229        | -0.119        | -0.081        | 0.122         | -0.141        | -0.221        | 0.015         | 0.211         | 0.4           | 0.198         | 0.136         | 0.019         |
| Fx_L     | -0.092        | -0.187        | -0.181        | -0.108        | -0.113        | -0.197        | 0.333         | 0.048         | 0.056         | 0.258         | 0.235         | 0.038         |
| Fx_R     | -0.400        | -0.413        | -0.327        | -0.167        | -0.216        | -0.175        | 1.27E-05*     | 6.09E-        | 0.0004        | 0.079         | 0.022         | 0.065         |



|                     |        |        |        |        |        |        |       |       |       |       |       |       |
|---------------------|--------|--------|--------|--------|--------|--------|-------|-------|-------|-------|-------|-------|
|                     |        |        |        |        |        |        |       | 06*   |       |       |       |       |
| IFO_L               | -0.058 | -0.209 | -0.270 | -0.19  | -0.179 | -0.220 | 0.545 | 0.027 | 0.004 | 0.045 | 0.058 | 0.02  |
| IFO_R               | -0.007 | -0.135 | -0.176 | -0.074 | -0.092 | -0.098 | 0.939 | 0.155 | 0.064 | 0.439 | 0.332 | 0.30  |
| PTR_L               | -0.156 | -0.013 | 0.058  | 0.19   | -0.029 | -0.01  | 0.101 | 0.892 | 0.541 | 0.045 | 0.759 | 0.3   |
| PTR_R               | -0.142 | -0.095 | -0.099 | 0.068  | -0.088 | -0.21  | 0.136 | 0.319 | 0.301 | 0.475 | 0.357 | 0.027 |
| SS_L                | -0.173 | -0.095 | -0.028 | 0.101  | -0.048 | -0.062 | 0.068 | 0.317 | 0.77  | 0.289 | 0.617 | 0.514 |
| SS_R                | -0.145 | -0.076 | -0.1   | 0.088  | -0.119 | -0.184 | 0.127 | 0.426 | 0.3   | 0.358 | 0.212 | 0.052 |
| SFO_L               | -0.148 | -0.134 | -0.148 | -0.035 | -0.141 | -0.114 | 0.118 | 0.157 | 0.12  | 0.714 | 0.138 | 0.233 |
| SFO_R               | -0.021 | 0.107  | 0.162  | 0.235  | -0.007 | -0.068 | 0.825 | 0.261 | 0.087 | 0.012 | 0.945 | 0.475 |
| SLF_L               | -0.245 | -0.145 | -0.094 | 0.089  | -0.022 | -0.056 | 0.01  | 0.126 | 0.323 | 0.348 | 0.821 | 0.561 |
| SLF_R               | -0.176 | -0.085 | -0.061 | 0.068  | -0.042 | -0.186 | 0.063 | 0.376 | 0.526 | 0.465 | 0.656 | 0.05  |
| UNC_L               | -0.126 | -0.113 | -0.102 | 0.043  | -0.03  | -0.052 | 0.185 | 0.234 | 0.286 | 0.651 | 0.755 | 0.59  |
| UNC_R               | -0.138 | -0.110 | -0.026 | 0.103  | -0.035 | -0.057 | 0.147 | 0.248 | 0.784 | 0.279 | 0.711 | 0.55  |
| AnsaLentricularis_L | -0.114 | -0.134 | -0.153 | 0.038  | -0.236 | -0.207 | 0.229 | 0.160 | 0.108 | 0.688 | 0.012 | 0.029 |
| AnsaLentricularis_R | -0.182 | -0.259 | -0.255 | -0.104 | -0.226 | -0.254 | 0.055 | 0.006 | 0.007 | 0.273 | 0.016 | 0.007 |
| AnteriorCom_L       | -0.147 | -0.184 | -0.145 | 0.034  | -0.185 | -0.192 | 0.121 | 0.053 | 0.128 | 0.724 | 0.051 | 0.043 |
| AnteriorCom_R       | -0.198 | -0.217 | -0.164 | 0.014  | -0.143 | -0.176 | 0.037 | 0.021 | 0.083 | 0.882 | 0.133 | 0.063 |
| LenticularFasc_L    | 0.148  | 0.134  | 0.043  | 0.061  | 0.115  | 0.061  | 0.12  | 0.159 | 0.654 | 0.521 | 0.223 | 0.526 |
| LenticularFasc_R    | -0.049 | 0.001  | 0.058  | 0.139  | -0.018 | 0.060  | 0.607 | 0.993 | 0.543 | 0.144 | 0.847 | 0.527 |

\*Statistically significant association meeting the Bonferroni threshold for multiple hypotheses testing; R: correlation of spearman test, Cer: ceramide; P: P value; abbreviation of the white matter regions of interest are available in table e1.

Supplementary Table e3 shows the results of the unadjusted (univariable) sensitivity analyses of the associations of rFA of the subcortical white matter regions of interest and ceramide subtypes.

| Variable | R Cer 18:0 | R Cer 20:0 | R Cer 22:0 | R Cer 24:0 | R Cer 22:1 | R Cer 24:1 | P Cer 18:0 | P Cer 20:0 | P Cer 22:0 | P Cer 24:0 | P Cer 22:1 | P Cer 24:1 |
|----------|------------|------------|------------|------------|------------|------------|------------|------------|------------|------------|------------|------------|
| ACR_L    | -0.211     | -0.171     | -0.101     | 0.051      | -0.053     | -0.039     | 0.029      | 0.079      | 0.3        | 0.599      | 0.585      | 0.692      |
| ACR_R    | -0.191     | -0.097     | -0.036     | 0.139      | -0.082     | -0.044     | 0.049      | 0.32       | 0.714      | 0.152      | 0.399      | 0.652      |
| SCR_L    | -0.214     | -0.16      | -0.139     | 0.045      | -0.059     | -0.022     | 0.027      | 0.099      | 0.153      | 0.645      | 0.546      | 0.819      |
| SCR_R    | -0.192     | -0.108     | -0.11      | 0.093      | -0.113     | -0.125     | 0.047      | 0.267      | 0.261      | 0.34       | 0.246      | 0.198      |
| PCR_L    | -0.068     | 0.013      | 0.07       | 0.179      | 0.16       | 0.149      | 0.49       | 0.897      | 0.474      | 0.065      | 0.099      | 0.126      |
| PCR_R    | -0.136     | 0.031      | 0.0002     | 0.136      | 0.045      | -0.12      | 0.163      | 0.752      | 0.998      | 0.163      | 0.643      | 0.217      |
| GCC_L    | -0.388     | -0.276     | -0.169     | -0.004     | -0.162     | -0.07      | 3.6E-05*   | 0.004      | 0.082      | 0.969      | 0.096      | 0.473      |
| GCC_R    | -0.211     | -0.131     | -0.022     | 0.108      | -0.001     | -0.007     | 0.029      | 0.178      | 0.82       | 0.267      | 0.988      | 0.943      |
| BCC_L    | -0.282     | -0.284     | -0.18      | -0.017     | -0.13      | -0.026     | 0.003      | 0.003      | 0.063      | 0.86       | 0.183      | 0.792      |
| BCC_R    | -0.337     | -0.305     | -0.222     | -0.06      | -0.12      | -0.063     | 0.0004     | 0.001      | 0.021      | 0.542      | 0.218      | 0.519      |
| SCC_L    | -0.225     | -0.178     | -0.035     | 0.033      | -0.104     | -0.029     | 0.02       | 0.067      | 0.717      | 0.739      | 0.286      | 0.766      |
| SCC_R    | -0.233     | -0.164     | -0.03      | 0.077      | -0.07      | -0.052     | 0.016      | 0.091      | 0.756      | 0.43       | 0.475      | 0.593      |
| RAP_L    | -0.21      | -0.123     | -0.131     | -0.057     | -0.151     | -0.163     | 0.03       | 0.205      | 0.177      | 0.563      | 0.12       | 0.093      |
| RAP_R    | -0.197     | -0.011     | 0.015      | 0.084      | 0.025      | -0.078     | 0.041      | 0.911      | 0.88       | 0.389      | 0.802      | 0.427      |
| ALIC_L   | -0.05      | -0.046     | -0.014     | 0.218      | -0.106     | -0.149     | 0.606      | 0.641      | 0.883      | 0.024      | 0.278      | 0.126      |
| ALIC_R   | 0.029      | 0.005      | 0.088      | 0.334      | -0.061     | 0.047      | 0.764      | 0.961      | 0.368      | 0.0004     | 0.532      | 0.631      |
| PLIC_L   | 0.003      | 0.134      | 0.134      | 0.324      | 0.107      | 0.194      | 0.972      | 0.168      | 0.17       | 0.001      | 0.271      | 0.045      |
| PLIC_R   | -0.074     | 0.003      | -0.01      | 0.255      | -0.031     | 0.01       | 0.447      | 0.975      | 0.917      | 0.008      | 0.749      | 0.915      |
| RLIC_L   | -0.106     | -0.057     | -0.042     | 0.076      | 0.098      | 0.137      | 0.275      | 0.563      | 0.665      | 0.434      | 0.317      | 0.16       |
| RLIC_R   | -0.106     | -0.078     | -0.056     | 0.111      | -0.1       | -0.227     | 0.277      | 0.425      | 0.568      | 0.256      | 0.305      | 0.019      |
| EC_L     | -0.25      | -0.118     | -0.124     | 0.109      | -0.127     | -0.198     | 0.01       | 0.225      | 0.203      | 0.263      | 0.191      | 0.041      |
| EC_R     | -0.162     | -0.105     | -0.073     | 0.09       | -0.03      | 0.025      | 0.096      | 0.28       | 0.458      | 0.355      | 0.755      | 0.798      |
| CGC_L    | -0.157     | -0.17      | -0.167     | 0.027      | -0.117     | -0.159     | 0.107      | 0.079      | 0.085      | 0.785      | 0.229      | 0.101      |
| CGC_R    | -0.106     | -0.125     | -0.156     | 0.006      | -0.233     | -0.184     | 0.279      | 0.2        | 0.109      | 0.947      | 0.016      | 0.057      |
| CGH_L    | -0.102     | -0.096     | -0.04      | 0.105      | 0.035      | 0.044      | 0.296      | 0.323      | 0.682      | 0.282      | 0.719      | 0.653      |
| CGH_R    | -0.138     | -0.109     | -0.158     | 0.071      | -0.179     | -0.123     | 0.156      | 0.262      | 0.104      | 0.465      | 0.065      | 0.208      |
| Fx/ST_L  | -0.294     | -0.183     | -0.158     | 0.064      | -0.043     | 0.041      | 0.002      | 0.059      | 0.103      | 0.513      | 0.661      | 0.676      |
| Fx/ST_R  | -0.234     | -0.14      | -0.132     | 0.095      | -0.196     | -0.237     | 0.015      | 0.15       | 0.174      | 0.329      | 0.043      | 0.014      |
| Fx_L     | -0.101     | -0.209     | -0.186     | -0.109     | -0.116     | -0.175     | 0.302      | 0.031      | 0.055      | 0.264      | 0.236      | 0.072      |
| Fx_R     | -0.421     | -0.444     | -0.354     | -0.183     | -0.234     | -0.155     | 6.4E-06*   | 1.6E-06*   | 0.00018    | 0.059      | 0.015      | 0.111      |

|                     |        |        |        |        |        |        |       |       |       |       |       |       |
|---------------------|--------|--------|--------|--------|--------|--------|-------|-------|-------|-------|-------|-------|
| IFO_L               | -0.044 | -0.209 | -0.298 | -0.201 | -0.21  | -0.211 | 0.656 | 0.031 | 0.002 | 0.038 | 0.03  | 0.029 |
| IFO_R               | -0.008 | -0.145 | -0.19  | -0.073 | -0.113 | -0.088 | 0.936 | 0.136 | 0.05  | 0.453 | 0.248 | 0.369 |
| PTR_L               | -0.167 | -0.03  | 0.016  | 0.145  | -0.068 | -0.121 | 0.085 | 0.761 | 0.871 | 0.135 | 0.485 | 0.215 |
| PTR_R               | -0.138 | -0.099 | -0.119 | 0.039  | -0.114 | -0.215 | 0.156 | 0.312 | 0.223 | 0.687 | 0.243 | 0.026 |
| SS_L                | -0.196 | -0.125 | -0.062 | 0.073  | -0.073 | -0.078 | 0.043 | 0.201 | 0.524 | 0.452 | 0.452 | 0.422 |
| SS_R                | -0.162 | -0.099 | -0.144 | 0.063  | -0.161 | -0.21  | 0.096 | 0.31  | 0.14  | 0.521 | 0.099 | 0.03  |
| SFO_L               | -0.158 | -0.144 | -0.148 | -0.023 | -0.131 | -0.133 | 0.105 | 0.138 | 0.127 | 0.813 | 0.179 | 0.173 |
| SFO_R               | -0.034 | 0.084  | 0.136  | 0.204  | -0.019 | -0.072 | 0.725 | 0.392 | 0.164 | 0.035 | 0.846 | 0.463 |
| SLF_L               | -0.264 | -0.17  | -0.118 | 0.068  | -0.035 | -0.062 | 0.006 | 0.08  | 0.228 | 0.484 | 0.72  | 0.523 |
| SLF_R               | -0.175 | -0.097 | -0.101 | 0.038  | -0.08  | -0.193 | 0.071 | 0.321 | 0.302 | 0.699 | 0.415 | 0.046 |
| UNC_L               | -0.135 | -0.119 | -0.118 | 0.058  | -0.054 | -0.068 | 0.165 | 0.221 | 0.225 | 0.553 | 0.583 | 0.489 |
| UNC_R               | -0.15  | -0.133 | -0.025 | 0.11   | -0.035 | -0.024 | 0.122 | 0.17  | 0.796 | 0.258 | 0.721 | 0.805 |
| AnsaLentricularis_L | -0.13  | -0.162 | -0.196 | -0.006 | -0.264 | -0.212 | 0.181 | 0.095 | 0.043 | 0.95  | 0.006 | 0.029 |
| AnsaLenticularis_R  | -0.196 | -0.293 | -0.309 | -0.154 | -0.262 | -0.267 | 0.043 | 0.002 | 0.001 | 0.113 | 0.006 | 0.005 |
| AnteriorCom_L       | -0.159 | -0.205 | -0.162 | 0.008  | -0.18  | -0.195 | 0.103 | 0.034 | 0.095 | 0.931 | 0.063 | 0.044 |
| AnteriorCom_R       | -0.208 | -0.239 | -0.193 | -0.022 | -0.149 | -0.179 | 0.032 | 0.013 | 0.046 | 0.822 | 0.126 | 0.065 |
| LenticularFasc_L    | 0.143  | 0.128  | 0.003  | 0.05   | 0.085  | 0.01   | 0.142 | 0.19  | 0.973 | 0.608 | 0.386 | 0.919 |
| LentricularFasc_R   | -0.054 | -0.003 | 0.022  | 0.12   | -0.049 | 0.022  | 0.581 | 0.973 | 0.822 | 0.218 | 0.615 | 0.825 |

\*Statistically significant association meeting the Bonferroni threshold for multiple hypotheses testing; R: correlation of spearman test, Cer: ceramide; P: P value; abbreviation of the white matter regions of interest are available in table e1.

Supplementary table e4 shows the results of spearman correlation of the regional fractional anisotropy (rFA) of the subcortical white matter regions of interest and grooved peg board test in the whole cohort and in the sensitivity analysis.

| Subcortical white matter region | Whole study cohort |          | Sensitivity analysis |          |
|---------------------------------|--------------------|----------|----------------------|----------|
|                                 | (R) GPBT           | (P) GPBT | (R) GPBT             | (P) GPBT |
| ACR_L                           | -0.31              | 0.00088* | -0.303               | 0.002    |
| ACR_R                           | -0.285             | 0.002    | -0.276               | 0.004    |
| SCR_L                           | -0.136             | 0.152    | -0.169               | 0.082    |
| SCR_R                           | -0.147             | 0.123    | -0.171               | 0.078    |
| PCR_L                           | 0.035              | 0.714    | 0.008                | 0.938    |
| PCR_R                           | -0.15              | 0.115    | -0.178               | 0.066    |
| GCC_L                           | -0.314             | 0.00075* | -0.296               | 0.002    |
| GCC_R                           | -0.158             | 0.09     | -0.14                | 0.151    |
| BCC_L                           | -0.236             | 0.0123   | -0.222               | 0.022    |
| BCC_R                           | -0.289             | 0.002    | -0.268               | 0.005    |
| SCC_L                           | -0.258             | 0.006    | -0.253               | 0.009    |
| SCC_R                           | -0.153             | 0.108    | -0.143               | 0.142    |
| TAP_L                           | -0.050             | 0.598    | -0.065               | 0.504    |
| TAP_R                           | -0.253             | 0.007    | -0.27                | 0.005    |
| ALIC_L                          | -0.056             | 0.556    | -0.081               | 0.408    |
| ALIC_R                          | 0.07               | 0.465    | 0.056                | 0.569    |
| PLIC_L                          | 0.042              | 0.66     | 0.019                | 0.849    |
| PLIC_R                          | -0.128             | 0.178    | -0.111               | 0.257    |
| RLIC_L                          | -0.018             | 0.848    | -0.024               | 0.803    |
| RLIC_R                          | -0.086             | 0.366    | -0.087               | 0.375    |
| EC_L                            | -0.344             | 0.0002*  | -0.318               | 0.00085* |
| EC_R                            | -0.204             | 0.031    | -0.207               | 0.033    |
| CGC_L                           | -0.170             | 0.073    | -0.174               | 0.074    |
| CGC_R                           | -0.179             | 0.059    | -0.183               | 0.059    |
| CGH_L                           | 0.0013             | 0.989    | 0.004                | 0.969    |
| CGH_R                           | -0.136             | 0.153    | -0.183               | 0.059    |
| Fx/ST_L                         | -0.213             | 0.024    | -0.227               | 0.018    |

|                    |        |           |        |           |
|--------------------|--------|-----------|--------|-----------|
| Fx/ST_R            | -0.169 | 0.076     | -0.172 | 0.076     |
| Fx_L               | -0.335 | 0.000306* | -0.298 | 0.002     |
| Fx_R               | -0.446 | 8.2E-07*  | -0.419 | 7.17E-06* |
| IFO_L              | -0.087 | 0.36      | -0.046 | 0.635     |
| IFO_R              | -0.103 | 0.281     | -0.08  | 0.412     |
| PTR_L              | -0.034 | 0.718     | -0.081 | 0.405     |
| PTR_R              | -0.136 | 0.153     | -0.162 | 0.095     |
| SS_L               | -0.101 | 0.289     | -0.121 | 0.213     |
| SS_R               | -0.102 | 0.285     | -0.123 | 0.208     |
| SFO_L              | -0.232 | 0.014     | -0.236 | 0.015     |
| SFO_R              | -0.080 | 0.40      | -0.096 | 0.326     |
| SLF_L              | -0.186 | 0.049     | -0.202 | 0.037     |
| SLF_R              | -0.222 | 0.019     | -0.231 | 0.017     |
| UNC_L              | -0.091 | 0.34      | -0.081 | 0.408     |
| UNC_R              | -0.113 | 0.237     | -0.07  | 0.471     |
| AnsaLenticularis_L | 0.002  | 0.986     | -0.006 | 0.951     |
| AnsaLenticularis_R | -0.069 | 0.471     | -0.087 | 0.374     |
| AnteriorCom_L      | 0.048  | 0.618     | 0.038  | 0.7       |
| AnteriorCom_R      | 0.014  | 0.886     | -0.004 | 0.971     |
| LenticularFasc_L   | -0.107 | 0.259     | -0.172 | 0.076     |
| LenticularFasc_R   | -0.084 | 0.381     | -0.14  | 0.15      |

\*Statistically significant association meeting the Bonferroni threshold, R: spearman correlation, P: p value; abbreviation of the white matter regions of interest are available in table e1.

Supplementary table e5 shows spearman correlation between ceramide subtypes and the grooved pegboard test in the whole study cohort and in the sensitivity analysis.

| Variable             | Whole study cohort |          | Sensitivity analysis |          |
|----------------------|--------------------|----------|----------------------|----------|
|                      | (R) GPBT           | (P) GPBT | (R) GPBT             | (P) GPBT |
| <b>Ceramide 18:0</b> | 0.283              | 0.0025*  | 0.271                | 0.0048*  |
| <b>Ceramide 20:0</b> | 0.176              | 0.063    | 0.164                | 0.091    |
| <b>Ceramide 22:0</b> | 0.23               | 0.015    | 0.216                | 0.025    |
| <b>Ceramide 24:0</b> | 0.12               | 0.209    | 0.104                | 0.285    |
| <b>Ceramide 22:1</b> | 0.247              | 0.009    | 0.243                | 0.012    |
| <b>Ceramide 24:1</b> | 0.216              | 0.022    | 0.183                | 0.059    |

\*met the Bonferroni threshold for significance; GPBT: grooved peg board test; P: p value; R: spearman correlation.
